# Supplementary material for: Harvesting of Prebiotic Fructooligosaccharides by Nonbeneficial Human Gut Bacteria
Source: PubMed Central journal article supplement (PMC6952197; doi:10.1128/msphere.00771-19), 2020-01-08

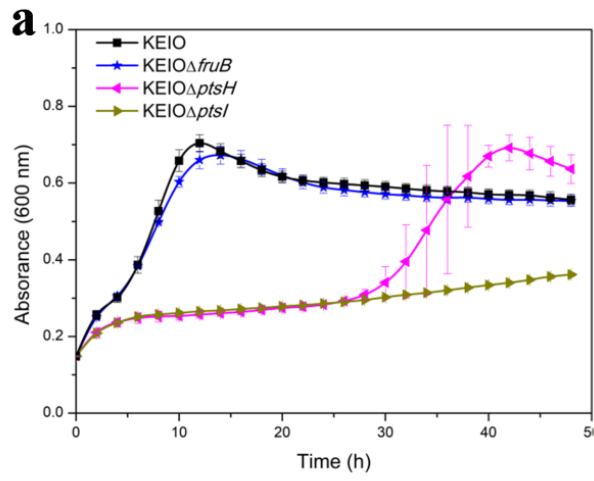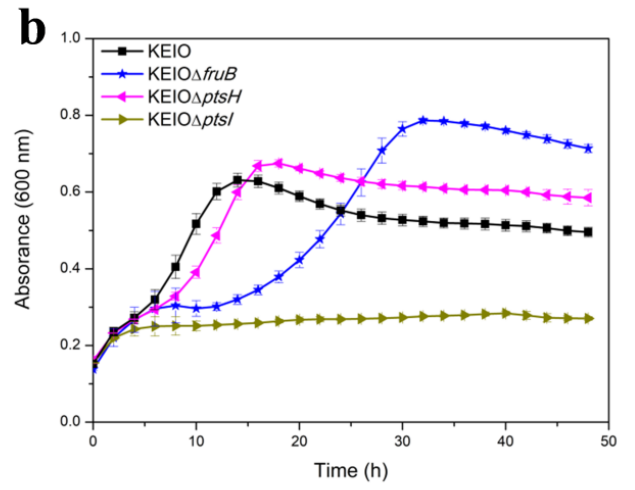

Supplement: mSphere.00771-19-sf004.pdf [file mSphere.00771-19-sf004.pdf]
